# Supplementary material for: Electrochemical formation of Cu/Ag surfaces and their applicability as heterogeneous catalysts
Source: Royal Society of Chemistry journal article supplement (doi:10.1039/c3ra47557c), 2014-01-01
Supplement: c3ra47557c.pdf [file c3ra47557c.pdf]

# Electrochemical formation of Cu/Ag surfaces and their applicability as heterogeneous catalysts

Ilija Najdovski,<sup>a,b</sup> PR Selvakannan<sup>a,b</sup> and Anthony P. O'Mullane<sup>\*a,c</sup>

<sup>a</sup> School of Applied Sciences, RMIT University, GPO Box 2476V, Melbourne, Vic 3001, Australia

<sup>b</sup> Centre for Advanced Materials and Industrial Chemistry, School of Applied Sciences, RMIT University, GPO Box 2476V, Melbourne, Vic 3001, Australia

<sup>c</sup> Present address: School of Chemistry, Physics and Mechanical Engineering, Queensland University of Technology, GPO Box 2434, Brisbane, QLD 4001, Australia  
Email: anthony.omullane@qut.edu.au

## Supplementary Information

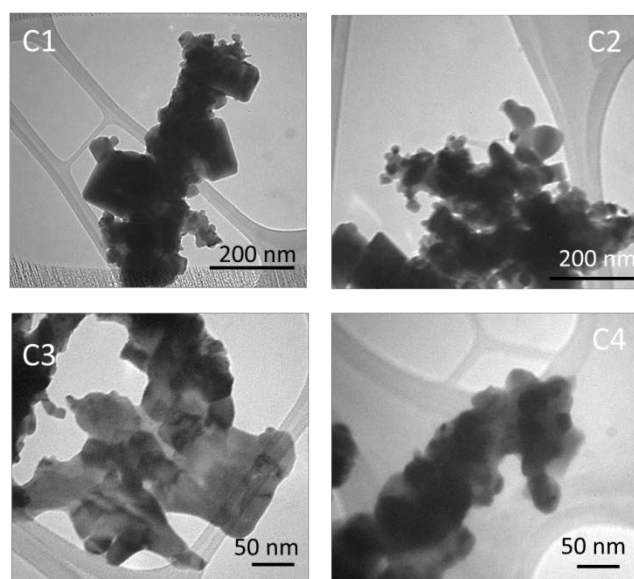

**Figure S1:** SEM images of porous Cu/Ag (C1-C4) electrodeposited at  $-3 \text{ A cm}^{-2}$  on copper foil from 0.4 M  $\text{CuSO}_4$  in 1.5 M  $\text{H}_2\text{SO}_4$  containing 5 mM (C1), 10 mM (C2), 20 mM (C3) and 50 mM (C4)  $\text{AgNO}_3$  and then removed via sonication.
